Oct 5, 2020

**Inclusion of Variants Discovered from Diverse Populations  
Improves Polygenic Risk Score Transferability**

Taylor B. Cavazos<sup>1</sup> and John S. Witte<sup>1-3</sup>

**Affiliations:**

<sup>1</sup> Biological and Medical Informatics, University of California San Francisco, San Francisco, CA

<sup>2</sup> Department of Epidemiology and Biostatistics, University of California San Francisco, San Francisco, CA

<sup>3</sup> Institute for Human Genetics, University of California San Francisco, San Francisco, CA

**Corresponding Author:**

John S. Witte

University of California, San Francisco

1450 3rd Street, San Francisco, CA 94158

Phone: (415) 502-6882

Email: [jwitte@ucsf.edu](mailto:jwitte@ucsf.edu)

## **ABSTRACT**

The majority of polygenic risk scores (PRS) have been developed and optimized in individuals of European ancestry and may have limited generalizability across other ancestral populations. Understanding aspects of PRS that contribute to this issue and determining solutions is complicated by disease-specific genetic architecture and limited knowledge of sharing of causal variants and effect sizes across populations. Motivated by these challenges, we undertook a simulation study to assess the relationship between ancestry and the potential bias in PRS developed in European ancestry populations. Our simulations show that the magnitude of this bias increases with increasing divergence from European ancestry, and this is attributed to population differences in linkage disequilibrium and allele frequencies of European discovered variants, likely as a result of genetic drift. Importantly, we find that including into the PRS variants discovered in African ancestry individuals has the potential to achieve unbiased estimates of genetic risk across global populations and admixed individuals. We confirm our simulation findings in an analysis of HbA1c, asthma, and prostate cancer in the UK Biobank. Given the demonstrated improvement in PRS prediction accuracy, recruiting larger diverse cohorts will be crucial—and potentially even necessary—for enabling accurate and equitable genetic risk prediction across populations.

## 1 INTRODUCTION

2 Increasing research into polygenic risk scores (PRS) for disease prediction highlights their clinical  
3 potential for informing screening, therapeutics, and lifestyle<sup>1</sup>. While their use enables risk  
4 prediction in individuals of European ancestry, PRS can have widely varying and much lower  
5 accuracy when applied to non-European populations<sup>2-4</sup>. Although the nature of this bias is not  
6 well understood, it can be attributed to the vast overrepresentation of European ancestry  
7 individuals in genome-wide association studies (GWAS), which is 4.5-fold higher than their  
8 percentage of the world population; conversely, there is underrepresentation of diverse  
9 populations such as individuals of African ancestry in GWAS, which is one fifth their percentage<sup>3</sup>.  
10 Potential explanations for the limited portability of European derived PRS across populations  
11 includes differences in population allele frequencies and linkage disequilibrium, the presence of  
12 population-specific causal variants or effects, or potential differences in gene-gene or gene-  
13 environment interactions<sup>4</sup>. However, in traits such as body mass index and type 2 diabetes, 70 to  
14 80% of European-based PRS accuracy loss in African ancestry has been attributed to differences  
15 in allele frequency and linkage disequilibrium; therefore, most causal variants discovered in  
16 Europeans are likely to be shared<sup>5</sup>. Recent methods developed to improve PRS accuracy in non-  
17 Europeans have prioritized the use of European discovered variants and population specific  
18 weighting<sup>6-8</sup>. However, only small gains in accuracy are possible with limited sample sizes of non-  
19 European cohorts<sup>4</sup>.

20  
21 PRS have been applied and characterized within global populations, but there is limited  
22 understanding of PRS accuracy in recently admixed individuals and whether this varies with  
23 ancestry. Studies applying PRS in diverse populations<sup>3-5,9</sup> or exploring potential statistical  
24 approaches to improve accuracy in such populations<sup>6,10</sup> typically present performance metrics  
25 averaged across all admixed individuals. Only one study to date has suggested that PRS  
26 accuracy may be a function of genetic admixture (i.e., for height in the UK Biobank<sup>8</sup>). However, it

27 is unknown if the relationship between accuracy and ancestry exists when variants are discovered  
28 in non-European populations or what the best approach for applying PRS to admixed individuals  
29 will be when there are adequately powered GWAS in non-European populations.

30

31 To help answer these questions, here we systematically and empirically explore the relationship  
32 between PRS performance and ancestry within African, European, and admixed ancestry  
33 populations through simulations. We highlight PRS building approaches that will achieve  
34 unbiased estimates across global populations and admixed individuals with future recruitment  
35 and representation of non-European ancestry individuals in GWAS. We also investigate reasons  
36 for loss of PRS accuracy, and attribute this to population differences in linkage disequilibrium (LD)  
37 tagging of causal variants by lead GWAS variants, as well as allele frequency biases potentially  
38 due to genetic drift undergone by European ancestry populations. Finally, we confirm our  
39 simulation findings by application to data on HbA1c levels, asthma, and prostate cancer in  
40 individuals of European and individuals of African ancestry from the UK Biobank.

41

## 42 **MATERIAL AND METHODS**

### 43 **Simulation of Population Genotypes**

44 We used the coalescent model (msprime v.7.3<sup>11</sup>) to simulate European (CEU) and African (YRI)  
45 genotypes, based on whole-genome sequencing of HapMap populations, for chromosome 20 as  
46 described previously by Martin et al.<sup>2</sup> Genotypes were modeled after the demographic history of  
47 human expansion out of Africa<sup>12</sup>, assuming a mutation rate of  $2 \times 10^{-8}$ . We simulated 200,000  
48 Europeans and 200,000 Africans for each simulation trial, for a total of 50 independent simulations  
49 (20 million total individuals). We generated founders from an additional 1,000 Europeans and  
50 1,000 Africans (10,000 total across the 50 simulations) to simulate 5,000 admixed individuals  
51 (250,000 total across the 50 simulations) with RFMIX v.2<sup>13</sup> assuming two-way admixture between  
52 Europeans and Africans with random mating and 8 generations of admixture.

53

#### 54 **True and GWAS Estimated Polygenic Risk Scores**

55 We generated true genetic liability for all European, African, and admixed individuals within each  
56 simulation trial<sup>2</sup>. Briefly,  $m$  variants evenly spaced throughout the simulated genotypes were  
57 selected to be causal and the effect sizes ( $\beta$ ) were drawn from a normal distribution  $\beta \sim N\left(0, \frac{h^2}{m}\right)$ ,  
58 where  $h^2$  is the heritability<sup>2</sup>. Constant heritability and complete sharing of effect sizes in African  
59 ancestry and European ancestry individuals was assumed. The true genetic liability was  
60 computed as the summation of all variant effects multiplied by their genotype for each individual  
61 ( $X = \sum_{i=1}^m \beta_m g_m$ ) standardized to ensure total variance of  $h^2$  ( $G = \frac{X - \mu_X}{\sigma_X} * \sqrt{h^2}$ ). Finally, the non-  
62 genetic effect ( $\varepsilon = N(0, 1 - h^2)$ ) standardized to explain the remainder of the phenotypic variation  
63 ( $E = \frac{\varepsilon - \mu_\varepsilon}{\sigma_\varepsilon} * \sqrt{1 - h^2}$ ) was added to the genetic risk defining the total trait liability  $(G + E)^2$ . Cases  
64 were selected from the extreme tail of the liability distribution, assuming a 5% disease prevalence.  
65 An equal number of controls and 5,000 testing samples were randomly selected from the  
66 remainder of the distribution; all 5,000 admixed individuals were also used for testing. Across  
67 simulation replicates we varied causal variants ( $m = \{200, 500, 1000\}$ ) and trait heritability ( $h^2 =$   
68  $\{0.33, 0.50, 0.67\}$ ); however, for simplicity main text results assume  $m = 1000$  and  $h^2 = 0.50$ .

69

70 The estimated PRS were constructed from GWAS of the simulated genotypes (modeled after  
71 chromosome 20) in European and African ancestry populations, each with 10,000 cases and  
72 10,000 controls. Odds ratios (ORs) were estimated for all variants with minor allele frequency  
73 (MAF) > 1% and statistical significance of association was assessed with a chi-squared test. While  
74 causal variants may be included in the estimated PRS, they are drawn from the total allele  
75 frequency spectrum; thus, they are primarily rare (93% and 87% of causal variants have MAF <  
76 1% in European and African ancestry populations when  $m = 1000$ ) and restricted from our  
77 analysis. For each population, variants were selected for inclusion into the estimated PRS by p-

78 value thresholding ( $p = 0.01$  (*Main Text*),  $1 \times 10^{-4}$ , and  $1 \times 10^{-6}$  (*Supplements*)) and clumping ( $r^2 <$   
79  $0.2$ ) in a 1 Mb window within the GWAS population, where  $r^2$  is the squared Pearson correlation  
80 between pairs of variants. A fixed-effects meta-analysis was also performed to calculate the  
81 inverse-variance weighted average of the ORs in African and European ancestry populations,  
82 and LD  $r^2$  values for clumping used both datasets as the reference.

83  
84 For each individual, an estimated PRS was calculated as the sum of the  $\log(\text{OR})$  (i.e., the PRS  
85 'weights') multiplied by their genotype for all independent and significant variants at a given  
86 threshold. The PRS were constructed for testing samples with variants and weights each selected  
87 from European or African ancestry GWAS, or a fixed-effects meta of both combined. Additional  
88 multi-ancestry PRS approaches<sup>7,10</sup> were also explored for admixed individuals. Accuracy was  
89 measured by Pearson's correlation ( $r$ ) between the true genetic liability and estimated PRS within  
90 each population. Across simulation trials, averages and ninety-five percent confidence intervals  
91 for  $r$  were calculated following a Fisher z-transformation for approximate normality<sup>14</sup>. The  
92 statistical significance of differences in accuracy between PRS approaches was assessed within  
93 ancestry groups, defined by global genome-wide European ancestry proportions, with a z-test  
94 (also following Fisher transformation). Specifically, within each simulation trial the z-statistic,  
95 measuring the difference between two PRS approaches, was computed and a two-sided p-value  
96 was obtained; results were summarized across trials by taking the median p-value. While using  $r$   
97 as a measure of accuracy has the added benefit of being independent from heritability, in admixed  
98 individuals we also calculate the proportion of variance ( $R^2$ ) for total trait liability (genetic and  
99 environmental component) explained by the estimated PRS.

100

## 101 **Multi-ancestry PRS**

102 *Local Ancestry Weighting PRS*

103 In addition to genotypes of simulated admixed individuals, RFMIX<sup>13</sup> also outputs the local ancestry  
104 at each locus for every individual. Thus, we used this information to create a local ancestry  
105 weighted PRS that is not impacted by ancestry inference errors. For admixed African and  
106 European ancestry individuals an ancestry-specific PRS was constructed for each population ( $k$ )  
107 by limiting each PRS to variants found in that ancestry-specific subset of the genome ( $i \in k$ ), as  
108 defined by local ancestry, and weighting using variant effects discovered in that population<sup>7</sup>. Each  
109 ancestry-specific PRS was then combined, weighted by the genome-wide global ancestry  
110 proportion ( $\rho_k$ ) for that individual as follows<sup>7</sup>:

$$111 \quad PRS = \rho_{EUR} \sum_{i \in EUR} \beta_{i, EUR} G_i + (1 - \rho_{EUR}) \sum_{i \in AFR} \beta_{i, AFR} G_i$$

112 In this way each individual has a PRS constructed from the same independent variants with  
113 personalized weights that are unique to the individual's local ancestry.

114

### 115 *Linear Mixture of Multiple Ancestry-Specific PRS*

116 Using a linear mixture approach developed by Márquez-Luna et al.<sup>10</sup> we combined two PRS  
117 estimated in each of our global training populations

$$118 \quad PRS = \alpha_1 PRS_{EUR} + \alpha_2 PRS_{AFR}$$

119 where individual PRS were constructed using significant and independent variants ( $p < 0.01$  and  
120  $r^2 < 0.2$  in a 1Mb window) and effect sizes from a GWAS in that training population. For  
121 simulations, mixing weights ( $\alpha_1$  and  $\alpha_2$ ) were estimated in an independent African ancestry testing  
122 population and as validation, accuracy was assessed in our simulated admixed ancestry  
123 individuals.

124

### 125 **Application to Real Data**

126 We obtained genome-wide summary statistics for HbA1c<sup>15</sup>, asthma<sup>16,17</sup>, and prostate cancer<sup>18,19</sup>  
127 calculated in European and African ancestry individuals (Table S1). Summary statistic variants

128 that were not present in both the UK Biobank European and African ancestry testing populations  
129 were removed. PRS for each phenotype were constructed from associated and independent  
130 GWAS variants within each training population by p-value thresholding ( $p = \{5 \times 10^{-8}, 1 \times 10^{-7}, 5 \times 10^{-7}, 1 \times 10^{-6}, 5 \times 10^{-6}, 1 \times 10^{-5}, 5 \times 10^{-5}, 1 \times 10^{-4}, 5 \times 10^{-4}, 1 \times 10^{-3}, 5 \times 10^{-3}, 0.01, 0.05, 0.1, 0.5, 1\}$ ) and clumping  
131 ( $LD r^2 < 0.2$ ) of variants within 1Mb with PLINK<sup>20</sup>. Additionally a fixed-effects meta-analysis of the  
132 two populations was performed using METASOFT v2.0.1<sup>21</sup>. The selected PRS variants exhibited  
133 limited heterogeneity between the European and African ancestry training set summary statistics.  
134 In particular, of all possible European (African) ancestry selected PRS variants, only 5.4% (9.4%),  
135 6.9% (5.7%), and 7.0% (4.8%) were heterogeneous between the two groups for HbA1c, asthma,  
136 and prostate cancer, respectively (i.e.,  $I^2 > 25\%$  and  $Q$  p-value  $< 0.05$ ).

138  
139 PRS performance was evaluated in an independent cohort using genotype and phenotype data  
140 for individuals of European ancestry and individuals of African ancestry (Table S1) from the UK  
141 Biobank, imputation and quality control previously described<sup>22</sup>. We undertook extensive post-  
142 imputation quality control of the UK Biobank, including the exclusion of relatives and ancestral  
143 outliers from within each group. Specifically, analyses were limited to self-reported European and  
144 African ancestry individuals, with additional samples excluded if genetic ancestry PCs did not fall  
145 within five standard deviations of the self-reported population mean. For each individual, their  
146 PRS was computed as the weighted sum of the genotype estimates of effect on each phenotype  
147 from the discovery studies (Table S1), multiplied by the genotype at each variant. For each  
148 population-specific variant set, weights from either the European or African summary statistics or  
149 the fixed-effects meta-analysis were used. A total of 96 polygenic risk scores were evaluated in  
150 each phenotype exploring the impact of ancestral population (two scenarios), p-value threshold  
151 (16 scenarios), and variant weighting (three scenarios). The proportion of variation explained by  
152 each PRS (partial- $R^2$ ) approach was assessed for UKB European-ancestry and African-ancestry  
153 individuals separately. The partial- $R^2$  was calculated from the difference in  $R^2$  values following



154 linear regression of HbA1c levels on age, sex, BMI, and PCs (1-10) with and without the PRS  
155 also included. Similarly, for asthma and prostate cancer, we determined the Nagelkerke's pseudo  
156 partial- $R^2$  following logistic regression of case status on age, sex (asthma only), BMI (prostate  
157 cancer only), and PCs (1-10) with and without the PRS. Additionally, in African ancestry  
158 individuals we created a combined PRS ( $\alpha_1 PRS_{EUR} + \alpha_2 PRS_{AFR}$ ) where  $PRS_{EUR}$  and  $PRS_{AFR}$  was  
159 the most optimal PRS using variants from the designated population and the weight and p-value  
160 that resulted in the highest accuracy; albeit in sample, optimization was done within a single PRS  
161 to ensure limited overfitting of the combined model<sup>10</sup>. We used 5-fold cross validation to assess  
162 model performance in which 80% of the cohort was used to estimate the mixing coefficients ( $\alpha_1$   
163 and  $\alpha_2$ ) and the combined PRS partial- $R^2$  was calculated in the remaining 20% of the data.  
164 Reported partial- $R^2$  was averaged across folds<sup>10</sup>. For our binary phenotypes with unbalanced  
165 cases and controls we used stratified 5-fold cross validation.

166

## 167 **RESULTS**

### 168 **Generalizability of European Derived Risk Scores to an Admixed Population**

169 We constructed PRS from our simulated European datasets and applied them to independent  
170 simulated European, African, and admixed testing populations, assuming 1000 true causal  
171 variants ( $m$ ) and trait heritability ( $h^2$ ) of 0.5. On average, 1552 (range = [1134-1920]) variants were  
172 selected for inclusion into the PRS at p-value < 0.01 and LD  $r^2$  < 0.2 (Table 1). The average  
173 accuracy across replicates (50 simulations), measured by the correlation ( $r$ ) between the true and  
174 inferred genetic risk, was much higher when applying the PRS to Europeans ( $r = 0.77$ ; 95% CI =  
175 [0.76, 0.77]) than to Africans ( $r = 0.45$ ; 95% CI = [0.44, 0.47]; Figure 1). This is in agreement with  
176 decreased performance seen in real data when applying a European derived genetic risk score  
177 to an African population<sup>2-5</sup>.

178

179 To understand the relationship between ancestry and PRS accuracy, admixed individuals were  
180 stratified by their proportion of genome-wide European (CEU) ancestry: high (100%>CEU>80%),  
181 intermediate (80%>CEU>20%), and low (20%>CEU>0%). PRS performance decreased with  
182 decreasing European ancestry (Figure 1). Average accuracy (Pearson's correlation) for the high,  
183 intermediate, and low European ancestry groups was 0.73 (95% CI = [0.72, 0.74]), 0.61 (95% CI  
184 = [0.60, 0.62]), and 0.53 (95% CI = [0.51, 0.54]), respectively (Figure 1). In comparison to  
185 Europeans, the performance of the European derived PRS was significantly lower in individuals  
186 with intermediate (20% decrease,  $p = 1.27 \times 10^{-47}$ ), and low (32% decrease,  $p = 6.48 \times 10^{-16}$ )  
187 European ancestry, and with African-only ancestry (41% decrease,  $p = 8.00 \times 10^{-155}$ ). There was  
188 no significant difference for individuals with high (5.3% decrease,  $p = 0.09$ ) European ancestry.  
189 These trends remained consistent when varying the genetic architecture (Figure S1), specifically  
190 decreasing the number of causal variants ( $m$ ) and varying the trait heritability ( $h^2$ ). Additionally,  
191 the relationship between ancestry and accuracy persisted with the inclusion of variants at lower  
192 p-value thresholds (Figure S2).

193  
194 By further binning admixed individuals into deciles of global European ancestry and determining  
195 the variance explained of the total liability (genetics and environment) by the PRS, we estimated  
196 a 1.34% increase in accuracy for each 10% increase in global European ancestry, replicating a  
197 previous analysis of height in the UK Biobank<sup>8</sup>. The slope of this linear relationship increased with  
198 increasing heritability but was not found to vary with the number of true causal variants (Figure  
199 S3).

200

### 201 **Population Specific Weighting of European Selected Variants**

202 Using a well-powered GWAS from our simulated African cohort (10,000 cases and 10,000  
203 controls), we aimed to explore the potential accuracy gains achieved from a PRS with European  
204 selected variants, but with population specific weighting of these variants. We applied three

205 different weighting approaches to incorporate non-European effect sizes: (1) effect sizes from an  
206 African ancestry GWAS for all variants; (2) effect sizes from a fixed-effects meta-analysis of  
207 European and African ancestry GWAS for all variants, both having 10,000 cases and 10,000  
208 controls; and (3) population specific weights based on the local ancestry for an individual at each  
209 variant in the PRS (Figure 2).

210  
211 The most accurate PRS approach varied by the proportion of European ancestry. Populations  
212 with greater than 20% African ancestry benefited significantly from the inclusion of population  
213 specific weights (Figure 2). Intermediate European ancestry benefitted most from using fixed-  
214 effects meta-analysis weighting instead of European weights ( $r = 0.64$  vs.  $0.61$ ,  $p = 0.02$ ). In  
215 contrast, variant weighting from an African ancestry GWAS instead of from European had higher  
216 accuracy in low European ancestry ( $r = 0.65$  vs.  $0.53$ ,  $p = 0.009$ ) and African-only ( $r = 0.64$  vs.  
217  $0.45$ ,  $p = 2.02 \times 10^{-44}$ ) populations. Individuals with high European ancestry had similar accuracy  
218 with weights from a fixed-effects meta-analysis as from European ( $r = 0.73$  in both,  $p = 0.79$ ), but  
219 decreased performance with the inclusion of weights from an African ancestry GWAS ( $r = 0.62$   
220 vs.  $0.73$ ,  $p = 0.01$ ).

221  
222 No clear benefits, and in some cases significant decreases, were observed for local ancestry  
223 informed weights compared to weights from a European or African ancestry GWAS or fixed-  
224 effects meta-analysis. Individuals with high, intermediate, and low European ancestry had lower  
225 accuracy using local ancestry informed weights compared to the best weighting in each ancestry  
226 group:  $r = 0.71$  vs.  $0.73$  (from fixed-effect or European weights;  $p = 0.58$ );  $r = 0.61$  vs.  $0.64$  (from  
227 fixed-effect weights;  $p = 0.004$ ); and  $r = 0.63$  vs.  $0.65$  (from African weights;  $p = 0.60$ ), respectively  
228 (Figure 2).

229

230 **Performance of Non-European PRS Variant Selection and Weighting Approaches**

231 In our simulations, population specific weighting of PRS SNPs discovered in European ancestry  
232 populations improved PRS accuracy; however, the disparity between performance in European  
233 ancestry individuals versus African and admixed ancestry individuals remained large. We aimed  
234 to explore the potential improvements in PRS that could be gained by including variants  
235 discovered in large, adequately powered African ancestry cohorts. Following clumping and  
236 thresholding of significant variants using LD and summary statistics from the simulated African  
237 populations, an average of 5269 (range = [4462-6071]) variants were included in the PRS (Table  
238 1) reflective of the greater genetic diversity and decreased LD compared to Europeans<sup>23</sup>. In  
239 contrast, when constructing a PRS using the same LD and p-value criteria applied to a fixed-  
240 effects meta-analysis of European and African ancestry, an average of only 92 (range = [38-197])  
241 variants were included in the PRS. This substantially smaller number was a result of few variants  
242 being statistically significant in both populations. Of the total number of variants included from the  
243 European GWAS, African ancestry GWAS, and fixed-effects meta, only 1.15%, 0.54%, and 15.0%  
244 on average were the exact causal variant from the simulation; an additional 3.72%, 5.34%, and  
245 33.3% tagged at least one causal variant with  $r^2 > 0.2$  (and were within  $\pm 1000$  kb of that causal  
246 variant) in European ancestry populations and 3.45%, 2.42%, and 28.1% in African ancestry  
247 populations (Table 1). The limited overlap between true causal and GWAS selected variants is a  
248 result of causal variants in our simulation arising from the total spectrum of allele frequencies, and  
249 therefore more likely to be rare, while GWAS is better powered to detect common variants in the  
250 study population from which they were identified<sup>2</sup>. These common variants may not adequately  
251 tag rare variants due to low correlation<sup>24</sup>.

252

253 Overall, we constructed twelve PRS with variants selected from GWAS in European or African  
254 ancestry populations or a fixed-effects meta of both (three scenarios) and weights from the same  
255 approaches plus an additional local ancestry specific weighting method (four scenarios) (Figure  
256 2). For Europeans, the highest PRS accuracy was achieved with European selected variants and

257 weights ( $r = 0.77$ ; 95% CI = [0.76, 0.77]); however, a similar accuracy was observed for weights  
258 from a fixed-effects meta ( $r = 0.76$ ;  $p = 0.53$ ). For Africans, the highest PRS accuracy was with  
259 African selected variants and weights from a fixed-effects meta ( $r = 0.75$ ; 95% CI = [0.74, 0.75]),  
260 similar performance was observed with African variants and weights ( $r = 0.74$ ,  $p = 0.28$ ). For  
261 admixed individuals, the highest performing PRS depended on the population ancestry  
262 percentage. In individuals with high European ancestry (>80%), the best PRS was with European  
263 selected variants and fixed-effects meta or European weights ( $r = 0.73$ ; 95% CI = [0.72, 0.74]).  
264 For individuals with intermediate (20%-80%) or low (<20%) European ancestry, the most accurate  
265 PRS was from using African selected variants and weights from a fixed-effects meta-analysis ( $r$   
266 = 0.68; 95% CI = [0.67, 0.68] and 0.71; 95% CI = [0.70, 0.72], respectively). Again, no benefit was  
267 observed with the inclusion of local ancestry specific weights for any set of PRS variants. Using  
268 a more stringent p-value threshold and including fewer variants into the PRS did not result in a  
269 change of the best PRS variants and weights (Figure S2).

270

### 271 **Inclusion of Variants from Diverse Populations**

272 We found that including in the PRS variants discovered in African ancestry GWAS with population  
273 specific weights results in less disparity in PRS accuracy across ancestries compared to  
274 European selected variants, confirming that GWAS in non-bottlenecked populations may yield a  
275 more unbiased set of disease variants<sup>25</sup>. For example, applying to individuals of African ancestry  
276 a PRS derived from GWAS variants and weights discovered in training data from the target  
277 population results in a 15.7% higher accuracy compared to using a PRS comprised of variants  
278 discovered in a European GWAS (also with African weights). In contrast, the gains in accuracy  
279 achieved by sourcing variants from ancestry-matched studies were much lower in European  
280 ancestry individuals. Compared to a PRS with variants from an African ancestry GWAS (with  
281 European weights), a PRS derived from a European GWAS (also with European weights) only

282 gave a 3.9% higher accuracy. We also observed better generalization of PRS based on African  
283 selected variants across all admixed groups (Figure 2).

284

285 Unlike in Europeans, a PRS with variants discovered in African ancestry populations generalized  
286 across ancestral groups with population-specific weighting. However, similar to the European  
287 PRS, the African ancestry derived PRS (with African variants and weights) was estimated to have  
288 a 1.62% increase in the variance explained of the total trait liability by the PRS for each 10%  
289 increase in African ancestry (Figure S4). Through a linear combination of the European and  
290 African ancestry derived PRS (Methods)<sup>10</sup>, the relationship between ancestry and accuracy  
291 diminished to less than a 0.4% increase per 10% increase of African ancestry (Figure S4).

292

293 While the best single PRS for admixed individuals with at least 20% African ancestry selected  
294 variants based on a GWAS in an African ancestry population with weights from a fixed-effects  
295 meta-analysis, a linear combination of the European and African ancestry derived PRS had higher  
296 accuracy; this was particularly true at decreased African ancestry cohort sizes. We saw  
297 considerable improvements with the combined PRS over using a European derived (European  
298 selected variants and weights) PRS, especially for low European ancestry (CEU < 20%) where  
299 even with 10-fold fewer African samples there was a 27.4% increase in PRS accuracy compared  
300 to the European derived risk score and a 12.3% increase compared to a PRS with African  
301 ancestry selected variants and weights from a fixed-effects meta (Figure 3).

302

### 303 **Allele Frequency and Linkage Disequilibrium of GWAS variants**

304 We sought to understand what factors impacted PRS generalizability across the different variant  
305 selection approaches. GWAS performed in European and African ancestry populations (for SNPs  
306 with  $MAF \geq 0.01$ ) were both more likely to identify significant variants that were more common in  
307 their own population than in the other. Approximately 60% of variants identified in European

308 ancestry populations had minor allele frequencies less than 1% in African ancestry populations  
309 and vice-versa; however, given the underlying assumption of homogeneity, the smaller number  
310 of variants selected by a meta-analysis of the two populations tended to have more similar minor  
311 allele frequencies (Figure 4a). Although European and African ancestry GWAS were both better  
312 powered to detect variants at intermediate frequencies within the same study population, GWAS  
313 in European ancestry populations may be unable to capture derived risk variants that have  
314 remained in Africa, which could be the result of genetic drift, whereas GWAS in African ancestry  
315 populations are not subject to this bias<sup>25</sup>.

316

317 We also examined LD tagging of causal variants by GWAS selected variants within our simulated  
318 European and African populations. Each causal variant's LD score was calculated by summing  
319 up the LD  $r^2$  between that causal variant and every GWAS tag variant within  $\pm 1000$  kb. The LD  
320 scores calculated in European and African ancestry populations were highly correlated (Pearson's  
321  $r > 0.7$ ) for the GWAS and fixed-effects meta selected variants. Variants selected from a fixed-  
322 effects meta had the highest LD score correlation between populations, as expected given that  
323 the variants reached significance in both populations and therefore were more common with  
324 similar LD patterns (Figure 4b). Since LD score correlation did not vary largely between  
325 simulations, we examined the raw LD scores for a single simulation in order to illustrate  
326 differences in LD score magnitude not captured by the Pearson's correlation.

327

328 We found that European selected variants had higher LD scores in European compared to in  
329 African ancestry populations; however, variants selected from an African ancestry GWAS tagged  
330 causal variants in both populations more strongly (Figure 4c). This is unlikely to be due to the  
331 larger number of African selected variants, as the results were unchanged following normalization  
332 of LD scores by dividing the total LD score for each causal variant by PRS size (Figure S5). Fixed-  
333 effects meta-analysis variants had similar LD score magnitudes. However, while a greater

334 proportion of the fixed-effects meta selected variants were causal, fewer were strong tags for  
335 causal variants not directly identified, highlighting the potential need for a model that does not  
336 assume homogeneity of effects for tag variants<sup>26</sup>. Additionally, causal variants with identical effect  
337 sizes may have differing allele frequencies across populations which would result in  
338 heterogeneous allele substitution effects; this helps indicate why a fixed-effects meta-analysis  
339 may not be the optimal approach.

340

### 341 **Application to Real Data**

342 To corroborate our simulation findings, we undertook an analysis of 96 PRS developed for the  
343 prediction of multiple complex traits in European and African ancestry individuals from the UK  
344 Biobank, including HbA1c levels, asthma status, and prostate cancer (Table S1). We tested  
345 variant selection strategies based on p-value thresholding and LD clumping of genome-wide  
346 summary statistics<sup>15</sup> computed in independent European or African ancestry cohorts and variant  
347 weights from the same approaches with an additional weighting from a fixed-effects meta across  
348 populations. Multiple p-value thresholds and weighting strategies were tested to assess the PRS  
349 accuracy in African ancestry individuals relative to European ancestry individuals across  
350 parameters.

351

352 In UK Biobank Europeans, a GWAS significant European-derived PRS (with European variants  
353 and weights) had a partial-R<sup>2</sup> of 1.6%, 1.2%, and 1.5% respectively for HbA1c levels, asthma,  
354 and prostate cancer; the same PRS applied to African ancestry individuals, with approximately  
355 13.1% European ancestry<sup>8</sup>, only explained 0.07%, 0.38%, and 0.19% (Figure S6). Although the  
356 proportion of variation explained by the PRS (partial-R<sup>2</sup>) was consistently lower in UK Biobank  
357 African ancestry individuals compared to Europeans, prediction was improved through the  
358 inclusion of variants or weights discovered in an independent African ancestry cohort across all  
359 traits (Figure S6). Interestingly, we found that a linear combination of the best performing PRS



360 with European discovered variants and African ancestry discovered variants improved accuracy  
361 substantially (Table S2), supporting our simulation finding that a combined PRS which includes  
362 variants from the target population, even at smaller sample sizes, is the optimal approach for  
363 constructing PRS in admixed and non-European individuals.

364

## 365 **DISCUSSION**

366 Our work shows that incorporating variants selected from European GWAS into a PRS can result  
367 in less accurate prediction in non-European and admixed populations in comparison to variants  
368 selected from a well-powered African ancestry GWAS. Through simulations and application to  
369 real data analysis of multiple complex traits, we provide empirical evidence that supports the use  
370 of a linear mixture of multiple population derived PRS to remove bias with ancestry and achieve  
371 higher accuracy in admixed individuals with currently available non-European sample sizes. We  
372 also demonstrate the anticipated improvements in PRS prediction accuracy that may be achieved  
373 with the inclusion of diverse individuals in GWAS, highlighting the need to actively recruit non-  
374 European populations.

375

376 Our simulation finding that prediction accuracy of a European derived PRS linearly decreases  
377 with increasing proportion of African ancestry in admixed African and European populations is  
378 consistent with a recent study of height where there was a 1.3% decrease for each 10% increase  
379 in African ancestry<sup>8</sup>. This decrease in prediction accuracy has been attributed to linkage  
380 disequilibrium and allele frequency differences, as well as differences in effect sizes across  
381 populations contributing to height<sup>8</sup>. Our work adds further insights into this reduction in PRS  
382 accuracy, showing that (1) it exists in the absence of trans-ancestry effect size differences  
383 consistent with previous theoretical models that did look at admixture<sup>2,5</sup>, and (2) variants selected  
384 from an African population may not have these same biases. Recent work found that known  
385 GWAS loci discovered in Europeans have allele frequencies that are upwardly biased by 1.15%

386 in African ancestry populations which results in a misestimated PRS; a phenomenon that likely  
387 arises due to population bottlenecks and ascertainment bias from GWAS arrays<sup>25</sup>. In our  
388 simulation study, which was not impacted by ascertainment bias, we show that GWAS in African  
389 ancestry populations also identify variants with population allele frequency differences; however,  
390 these variants have more consistent LD tagging of causal variants across populations. Our  
391 observations support the hypothesis that well-powered African ancestry GWAS will be able to  
392 more accurately capture disease associated loci that are more broadly applicable across  
393 populations, due to having undergone less genetic drift<sup>25</sup>.

394

395 A major advantage of our study is having large simulated European and African ancestry cohorts  
396 to provide guidelines for developing the best possible PRS in admixed individuals with current  
397 and future GWAS. Through our exploration of 12 PRS, with various variant selection and  
398 weighting approaches, we re-capitulate recent results applying similar PRS strategies to an  
399 admixed Hispanic/Latino population<sup>9</sup>. For individuals with intermediate proportions of European  
400 ancestry (20-80%), we also see improvements using European selected variants and population-  
401 specific or fixed-effects meta weights; however, as non-European cohorts get increasingly large  
402 it will be imperative to perform variant discovery in these populations as gains in accuracy with  
403 weight adjustment of European selected variants will be limited especially in individuals with  
404 higher proportions of non-European ancestry.

405

406 Current methods for improving PRS accuracy in diverse populations have prioritized the inclusion  
407 of variants from European GWAS, as these have higher statistical power to identify trait  
408 associated loci. For example, one such approach uses a two-component linear mixed model to  
409 allow for the incorporation of ethnic-specific weights<sup>6</sup>. Another method creates ancestry-specific  
410 partial PRS for each individual based on the local ancestry of variants selected from a European  
411 GWAS<sup>7</sup>. This approach was found to improve trait predictability, compared to a traditional PRS

412 with population specific or European weights, in East Asians for BMI but not height<sup>7</sup>. In contrast,  
413 implementing this local-ancestry method<sup>7</sup> in our simulation, we found that PRS accuracy was  
414 higher with African or fixed-effects meta weighting than with local ancestry in admixed African  
415 ancestry populations. Our results suggest that true equality in performance will be difficult to  
416 obtain solely based on European-identified variants even with local ancestry-adjusted weights.  
417 Although local ancestry weighting may have greater benefits when complete sharing across  
418 populations is not assumed, we show that in the absence of population-specific factors, the  
419 optimal PRS approach involves using variants identified in a large African population and  
420 population-specific weighting.

421  
422 To create a multi-ancestry PRS without incorporating local ancestry, *Márquez-Luna et al. (2017)*  
423 uses a mixture of PRS taking advantage of existing well-powered GWAS studies and  
424 supplementing with additional information that can be gained from a smaller study in the  
425 population of interest<sup>10</sup>. While this approach may offer relative improvement in PRS accuracy for  
426 non-Europeans compared to a European-derived PRS, our simulation suggests that the inclusion  
427 of significant tag variants discovered in Europeans may unnecessarily hinder predictive  
428 performance in non-Europeans. We investigate this approach in the context of varying admixture  
429 proportions and find that it achieved high accuracy across all admixed individuals, was not biased  
430 by ancestry, and significantly improved performance over a European-only PRS with 10-fold fewer  
431 African ancestry cases. Thus, a combination of multiple single population PRS may be the best  
432 currently available approach for admixed individuals, and this approach will likely continue to  
433 improve as the individual PRS are further developed.

434  
435 An important novel finding of our work that the inclusion of variants from an African-ancestry  
436 population results in less disparity in PRS accuracy across other populations, illustrates the need  
437 to recruit diverse populations in GWAS and make these data readily available. Large consortia

438 such as H3Africa, PAGE, the Million Veterans Program, and All of Us are undertaking efforts to  
439 support this initiative. Based on our analysis of HbA1c, asthma, and prostate cancer in the UK  
440 Biobank, we find that improvement in PRS prediction accuracy is currently possible by  
441 incorporating findings from GWAS in African ancestry populations, albeit with lower power. In  
442 addition to smaller sample sizes, this potential improvement may be limited by ascertainment bias  
443 in what SNPs are included on genotyping arrays and poorer imputation in non-Europeans. GWAS  
444 arrays and their imputation have substantially higher coverage among Europeans, and this may  
445 result in decreased PRS portability of findings across traits; in such situations, whole genome  
446 sequencing in diverse populations may be needed in order to improve accuracy<sup>27,28</sup>. Our study  
447 and others support the immense genetic diversity that can be unlocked by studying  
448 underrepresented populations to both eliminate the disparity in genetics for prediction medicine  
449 and provide novel insights into disease biology for all populations<sup>25,27,29</sup>.

450  
451 Although our simulation study provides important insight into the future of PRS use, it has  
452 important limitations. First, while coalescent simulations allow for decreased computational  
453 burden, model assumptions may result in inaccurate long-range linkage disequilibrium especially  
454 for whole genome simulations<sup>30</sup>. However, given we only simulated chromosome 20, biases are  
455 expected to be modest<sup>30</sup>. We also use a case-control framework for our simulation; therefore,  
456 power and potential differences in population PRS accuracy may be even higher if a quantitative  
457 trait was used. In addition, our simulations assume random mating among admixed individuals  
458 and therefore do not reflect the more complex assortative mating that may be observed, which  
459 may impact the distribution of local ancestry tract lengths in our simulation and therefore hinder  
460 the improvement of PRS accuracy by local ancestry weighting<sup>31</sup>. Also, although we provide  
461 evidence to suggest the contribution of population differences in allele frequency and LD tagging  
462 of causal variants to loss of PRS accuracy with varying ancestry, we do not delineate how each  
463 of these factors decrease accuracy independently; this is a direction for future work. Finally, we

464 have only simulated individuals from Yoruba, a West African population, which is not  
465 representative of the greater diversity in Sub Saharan Africa<sup>32</sup>. Future studies must be done to  
466 ensure our findings can be extended to individuals from other regions of Africa.

467

468 Overall, our findings support the concern that while studies have demonstrated the potential  
469 clinical utility of PRS, adopting the current versions of these scores could contribute to inequality  
470 in healthcare<sup>4</sup>. Going forward, future studies should prioritize the inclusion of diverse participants  
471 and care must be taken with the interpretation of currently available risk scores. While statistical  
472 approaches may offer improvements in accuracy compared to current European-derived risk  
473 scores, in order to truly diminish the disparity and achieve PRS accuracies similar to in European  
474 ancestry populations we must actively recruit and study diverse populations.

## **SUPPLEMENTAL DATA**

Document S1. Figures S1-S6 and Tables S1-S2

## **ACKNOWLEDGEMENTS**

This material is based upon work supported by the National Science Foundation Graduate Research Fellowship Program under Grant No. 1650113 and NIH grant CA201358. Any opinions, findings, and conclusions or recommendations expressed in this material are those of the author(s) and do not necessarily reflect the views of the National Science Foundation. This research has been conducted using the UK Biobank Resource under Application Number 14015. Furthermore, the authors thank Linda Kachuri for providing helpful feedback and discussion.

## **DECLARATION OF INTERESTS**

The authors declare no competing interests.



## WEB RESOURCES

HBA1 summary statistics (*Wheeler et al. 2018*): <https://www.magicinvestigators.org/downloads/>

Asthma summary statistics (*Daya et al. 2019* and *Demenaïs et al. 2018*):

<https://www.ebi.ac.uk/gwas/downloads/summary-statistics>

PrCa summary statistics (Emami et al. 2020): [https://www.ncbi.nlm.nih.gov/projects/gap/cgi-](https://www.ncbi.nlm.nih.gov/projects/gap/cgi-bin/study.cgi?study_id=phs001221.v1.p1)

[bin/study.cgi?study\\_id=phs001221.v1.p1](https://www.ncbi.nlm.nih.gov/projects/gap/cgi-bin/study.cgi?study_id=phs001221.v1.p1)

plink2: <https://www.cog-genomics.org/plink/2.0/>

RFMix: <https://github.com/slowkoni/rfmix>

METASOFT: [http://genetics.cs.ucla.edu/meta\\_jemdoc/](http://genetics.cs.ucla.edu/meta_jemdoc/)

## **DATA AND CODE AVAILABILITY**

The code generated during this study is available at

[https://github.com/taylorcavazos/PRS\\_Admixture\\_Simulation](https://github.com/taylorcavazos/PRS_Admixture_Simulation)

## REFERENCES

1. Torkamani, A., Wineinger, N.E., and Topol, E.J. (2018). The personal and clinical utility of polygenic risk scores. *Nature Reviews Genetics* 19, 581–590.
2. Martin, A.R., Gignoux, C.R., Walters, R.K., Wojcik, G.L., Neale, B.M., Gravel, S., Daly, M.J., Bustamante, C.D., and Kenny, E.E. (2017). Human Demographic History Impacts Genetic Risk Prediction across Diverse Populations. *Am. J. Hum. Genet.* 100, 635–649.
3. Duncan, L., Shen, H., Gelaye, B., Meijisen, J., Ressler, K., Feldman, M., Peterson, R., and Domingue, B. (2019). Analysis of polygenic risk score usage and performance in diverse human populations. *Nat Commun* 10, 3328.
4. Martin, A.R., Kanai, M., Kamatani, Y., Okada, Y., Neale, B.M., and Daly, M.J. (2019). Clinical use of current polygenic risk scores may exacerbate health disparities. *Nature Genetics* 51, 584.
5. Wang, Y., Guo, J., Ni, G., Yang, J., Visscher, P.M., and Yengo, L. (2020). Theoretical and empirical quantification of the accuracy of polygenic scores in ancestry divergent populations. *Nat Commun* 11, 3865.
6. Coram, M.A., Fang, H., Candille, S.I., Assimes, T.L., and Tang, H. (2017). Leveraging Multi-ethnic Evidence for Risk Assessment of Quantitative Traits in Minority Populations. *The American Journal of Human Genetics* 101, 218–226.
7. Marnetto, D., Pärna, K., Läll, K., Molinaro, L., Montinaro, F., Haller, T., Metspalu, M., Mägi, R., Fischer, K., and Pagani, L. (2020). Ancestry deconvolution and partial polygenic score can improve susceptibility predictions in recently admixed individuals. *Nat Commun* 11, 1628.
8. Bitarello, B.D., and Mathieson, I. (2020). Polygenic Scores for Height in Admixed Populations. G3 g3.401658.2020.
9. Grinde, K.E., Qi, Q., Thornton, T.A., Liu, S., Shadyab, A.H., Chan, K.H.K., Reiner, A.P., and Sofer, T. Generalizing polygenic risk scores from Europeans to Hispanics/Latinos. *Genetic Epidemiology* 0,
10. Márquez-Luna, C., Loh, P.-R., and Price, A.L. (2017). Multi-ethnic polygenic risk scores improve risk prediction in diverse populations. *Genet Epidemiol* 41, 811–823.
11. Kelleher, J., Etheridge, A.M., and McVean, G. (2016). Efficient Coalescent Simulation and Genealogical Analysis for Large Sample Sizes. *PLoS Comput Biol* 12, e1004842.
12. Gutenkunst, R.N., Hernandez, R.D., Williamson, S.H., and Bustamante, C.D. (2009). Inferring the Joint Demographic History of Multiple Populations from Multidimensional SNP Frequency Data. *PLoS Genet* 5, e1000695.
13. Maples, B.K., Gravel, S., Kenny, E.E., and Bustamante, C.D. (2013). RFMix: A Discriminative Modeling Approach for Rapid and Robust Local-Ancestry Inference. *The American Journal of Human Genetics* 93, 278–288.
14. Silver, N.C., and Dunlap, W.P. (1987). Averaging correlation coefficients: Should Fisher's z transformation be used? *Journal of Applied Psychology* 72, 146–148.

15. Wheeler, E., Leong, A., Liu, C.-T., Hivert, M.-F., Strawbridge, R.J., Podmore, C., Li, M., Yao, J., Sim, X., Hong, J., et al. (2017). Impact of common genetic determinants of Hemoglobin A1c on type 2 diabetes risk and diagnosis in ancestrally diverse populations: A transethnic genome-wide meta-analysis. *PLoS Med* *14*, e1002383.
16. CAAPA, Daya, M., Rafaels, N., Brunetti, T.M., Chavan, S., Levin, A.M., Shetty, A., Gignoux, C.R., Boorgula, M.P., Wojcik, G., et al. (2019). Association study in African-admixed populations across the Americas recapitulates asthma risk loci in non-African populations. *Nat Commun* *10*, 880.
17. Australian Asthma Genetics Consortium (AAGC) collaborators, Demenais, F., Margaritte-Jeannin, P., Barnes, K.C., Cookson, W.O.C., Altmüller, J., Ang, W., Barr, R.G., Beaty, T.H., Becker, A.B., et al. (2018). Multiancestry association study identifies new asthma risk loci that colocalize with immune-cell enhancer marks. *Nat Genet* *50*, 42–53.
18. Emami, N.C., Cavazos, T.B., Rashkin, S.R., Cario, C.L., Graff, R.E., Tai, C.G., Mefford, J.A., Kachuri, L., Wan, E., Wong, S., et al. (2020). Association Study of Over 200,000 Subjects Detects Novel Rare Variants, Functional Elements, and Polygenic Architecture of Prostate Cancer Susceptibility (Genomics).
19. Conti, D.V., and et al. (2020). Multiethnic GWAS meta-analysis identifies novel variants and informs genetic risk prediction for prostate cancer across populations. *Nature Genetics*.
20. Purcell, S., Neale, B., Todd-Brown, K., Thomas, L., Ferreira, M.A.R., Bender, D., Maller, J., Sklar, P., de Bakker, P.I.W., Daly, M.J., et al. (2007). PLINK: A Tool Set for Whole-Genome Association and Population-Based Linkage Analyses. *The American Journal of Human Genetics* *81*, 559–575.
21. Han, B., and Eskin, E. (2011). Random-Effects Model Aimed at Discovering Associations in Meta-Analysis of Genome-wide Association Studies. *The American Journal of Human Genetics* *88*, 586–598.
22. Bycroft, C., Freeman, C., Petkova, D., Band, G., Elliott, L.T., Sharp, K., Motyer, A., Vukcevic, D., Delaneau, O., O’Connell, J., et al. (2018). The UK Biobank resource with deep phenotyping and genomic data. *Nature* *562*, 203–209.
23. Campbell, M.C., and Tishkoff, S.A. (2008). African Genetic Diversity: Implications for Human Demographic History, Modern Human Origins, and Complex Disease Mapping. *Annu. Rev. Genom. Hum. Genet.* *9*, 403–433.
24. Li, B., and Leal, S.M. (2008). Methods for Detecting Associations with Rare Variants for Common Diseases: Application to Analysis of Sequence Data. *The American Journal of Human Genetics* *83*, 311–321.
25. Kim, M.S., Patel, K.P., Teng, A.K., Berens, A.J., and Lachance, J. (2018). Genetic disease risks can be misestimated across global populations. *Genome Biol* *19*,
26. Morris, A.P. (2011). Transethnic meta-analysis of genomewide association studies: Transethnic Meta-Analysis of GWAS. *Genet. Epidemiol.* *35*, 809–822.

27. Martin, A.R., Atkinson, E.G., Chapman, S.B., Stevenson, A., Stroud, R.E., Abebe, T., Akena, D., Alemayehu, M., Ashaba, F.K., Atwoli, L., et al. (2020). Low-coverage sequencing cost-effectively detects known and novel variation in underrepresented populations (*Genomics*).
28. Li, J.H., Mazur, C.A., Berisa, T., and Pickrell, J.K. (2020). Low-pass sequencing increases the power of GWAS and decreases measurement error of polygenic risk scores compared to genotyping arrays (*Genomics*).
29. Bentley, A.R., Callier, S.L., and Rotimi, C.N. (2020). Evaluating the promise of inclusion of African ancestry populations in genomics. *Npj Genom. Med.* 5, 5.
30. Nelson, D., Kelleher, J., Ragsdale, A.P., Moreau, C., McVean, G., and Gravel, S. (2020). Accounting for long-range correlations in genome-wide simulations of large cohorts. *PLoS Genet* 16, e1008619.
31. Zaitlen, N., Huntsman, S., Hu, D., Spear, M., Eng, C., Oh, S.S., White, M.J., Mak, A., Davis, A., Meade, K., et al. (2017). The Effects of Migration and Assortative Mating on Admixture Linkage Disequilibrium. *Genetics* 205, 375–383.
32. Gurdasani, D., Carstensen, T., Tekola-Ayele, F., Pagani, L., Tachmazidou, I., Hatzikotoulas, K., Karthikeyan, S., Iles, L., Pollard, M.O., Choudhury, A., et al. (2015). The African Genome Variation Project shapes medical genetics in Africa. *Nature* 517, 327–332.

## TABLES

**Table 1.** Summary of PRS Variants and Causal Tagging across Simulations

| GWAS Population    | Total # PRS Variants (p<0.01) | # Causal   | # in LD with a Causal Variant |                     |                     |                     |
|--------------------|-------------------------------|------------|-------------------------------|---------------------|---------------------|---------------------|
|                    |                               |            | r <sup>2</sup> >0.8           | r <sup>2</sup> >0.6 | r <sup>2</sup> >0.4 | r <sup>2</sup> >0.2 |
| European           | 1552 [1134-1920]              | 18 [10-26] |                               |                     |                     |                     |
| LD in Europeans    |                               |            | 27 [16-40]                    | 32 [22-44]          | 39 [25-55]          | 58 [38-80]          |
| LD in Africans     |                               |            | 20 [9-36]                     | 25 [16-42]          | 34 [24-54]          | 53 [35-70]          |
| African            | 5269 [4462-6071]              | 28 [18-40] | –                             | –                   | –                   | –                   |
| LD in Europeans    |                               |            | 94 [67-122]                   | 132 [95-171]        | 183 [123-238]       | 280 [202-364]       |
| LD in Africans     |                               |            | 37 [26-48]                    | 48 [34-61]          | 67 [50-89]          | 127 [81-170]        |
| Fixed-Effects Meta | 92 [38-197]                   | 12 [5-22]  | –                             | –                   | –                   | –                   |
| LD in Europeans    |                               |            | 15 [6-26]                     | 17 [6-28]           | 21 [9-39]           | 29 [16-47]          |
| LD in Africans     |                               |            | 13 [6-21]                     | 14 [6-25]           | 17 [9-29]           | 24 [10-43]          |

\* The number of variants is reported as the average and range [low-high] across the 50 simulations

**Table 1 Legend:** The set of PRS variants from each GWAS and the fixed-effects meta-analysis were selected by p-value thresholding ( $p < 0.01$ ) and clumping ( $r^2 < 0.2$ ) across the 50 simulations. Each PRS variant was compared to the causal set of variants ( $m = 1000$ ) within each simulation to determine the direct overlap between the two sets and the LD  $r^2$  between the PRS variant and every causal variant within a 1000 kb window. The total number of selected PRS variants that tag at least one causal variant at  $r^2$  greater than 0.8, 0.6, 0.4, or 0.2 is listed in the table.

## FIGURES

**Figure 1.** Accuracy of European Derived PRSs by Proportion of Total Ancestry

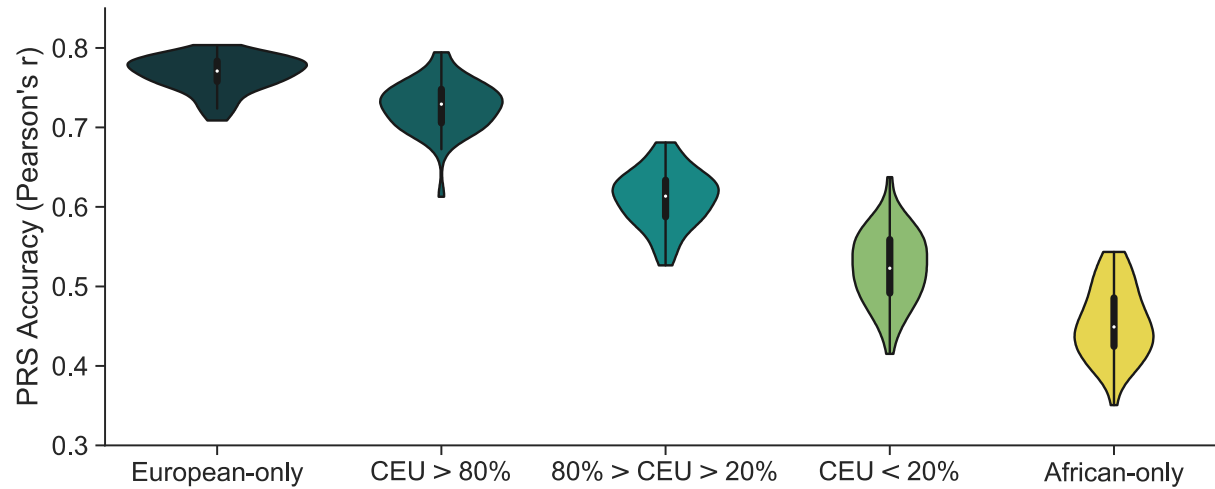

**Figure 1 Legend: Accuracy of PRS, with variants and weights from a European GWAS, decreases linearly with increasing proportion of African ancestry.** Variants and weights were extracted from a GWAS of 10000 European cases and 10000 European controls. PRS accuracy was computed as the Pearson's correlation between the true genetic risk and GWAS estimated risk score across 50 simulations in independent test populations of 5000 Europeans, 5000 Africans, and 5000 admixed individuals. Admixed individuals were grouped based on their proportion of genome-wide European ancestry. Simulations assume 1000 causal variants and a heritability of 0.5 to compute the true genetic risk. A p-value of 0.01 and LD  $r^2$  cutoff of 0.2 was used to select variants for the estimated risk score.

**Figure 2.** PRS Construction Approaches and Performance in Admixed Individuals

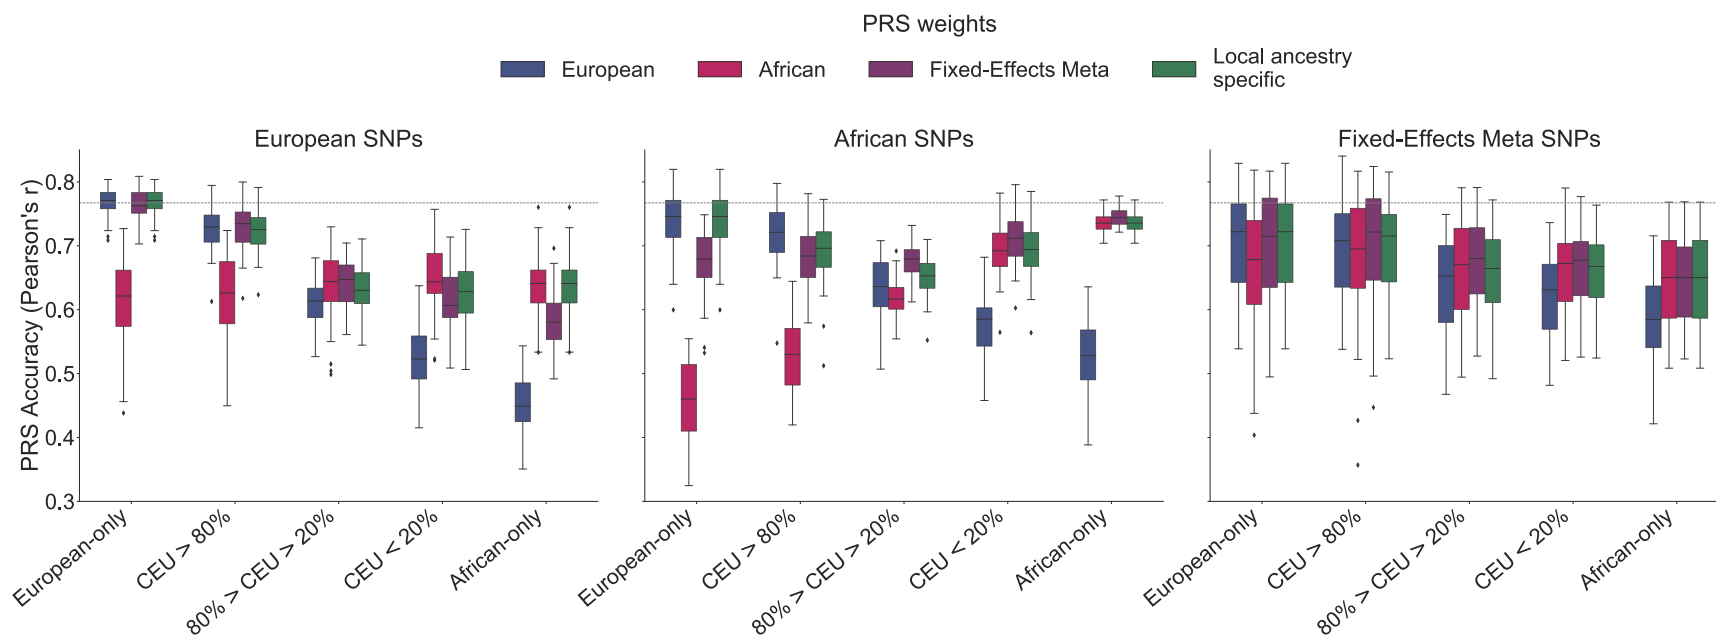

**Figure 2 Legend:** Using significant variants from an African Ancestry GWAS with population-specific weights results in less disparity in PRS accuracy across populations. PRS were constructed using variants and weights selected from either a European or African population (10000 cases, 10000 controls each) or a fixed-effects meta-analysis of both. An additional local ancestry specific method was used for PRS weighting. Performance, measured as the Pearson's correlation between the true and GWAS estimated risk score, is shown across 50 simulations. Simulations assume 1000 causal variants and a heritability of 0.5 to compute the true genetic risk. A p-value of 0.01 and LD  $r^2$  cutoff of 0.2 was used to select variants for the estimated risk scores.



**Figure 3.** Impact of African Sample Size on PRS Accuracy and Generalization

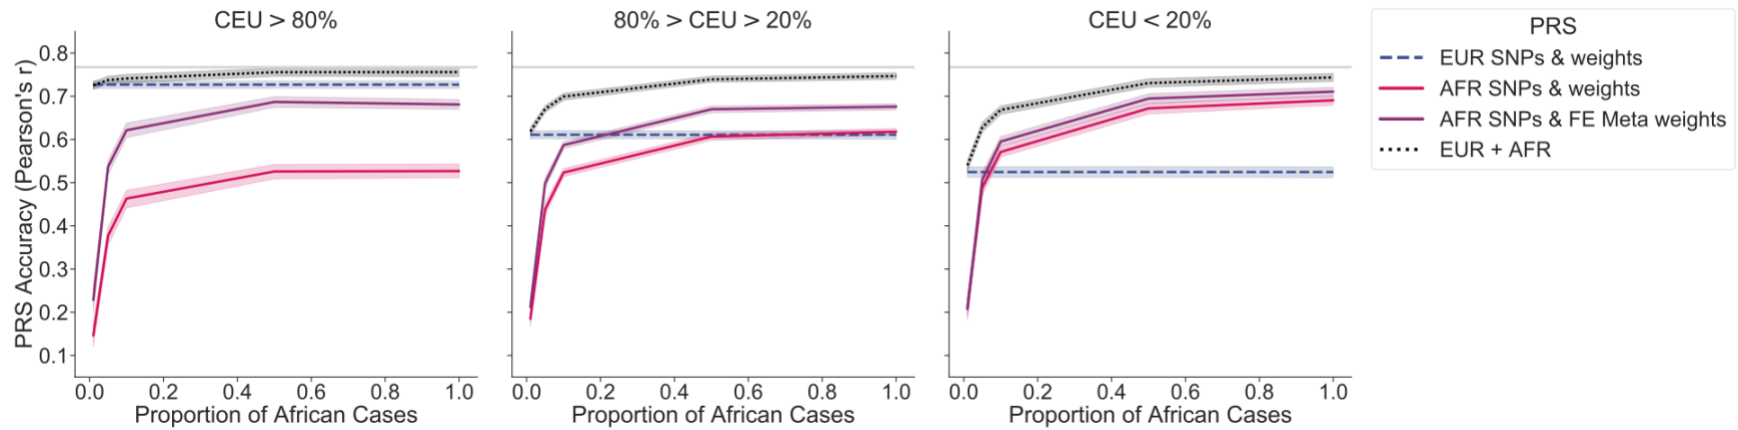

**Figure 3 Legend:** PRS accuracy in diverse populations can be improved by including data from an African Ancestry GWAS with smaller sample sizes than in a European GWAS. The number of African samples used in the GWAS and subsequent PRS construction was decreased to reflect availability of diverse samples in real data. Analysis was conducted assuming 1%, 5%, 10%, 50%, and 100% (matched size of European dataset) of the total African ancestry cases. Average accuracy and the 95% confidence interval were reported across the 50 simulations for different variant selection and weighting approaches. Simulations assume 1000 causal variants and a heritability of 0.5 to compute the true genetic risk. A p-value of 0.01 and LD  $r^2$  cutoff of 0.2 was used to select variants for the estimated risk score. A linear mixture of single population PRS ( $\alpha_1 EUR + \alpha_2 AFR$ ), with variants and weights selected from that population, was also tested in the admixed population. The mixture coefficients ( $\alpha_1$  and  $\alpha_2$ ) were estimated in an independent African ancestry testing population.

**Figure 4.** Allele Frequency Distribution of GWAS Selected Variants and LD Tagging of Causal Variants

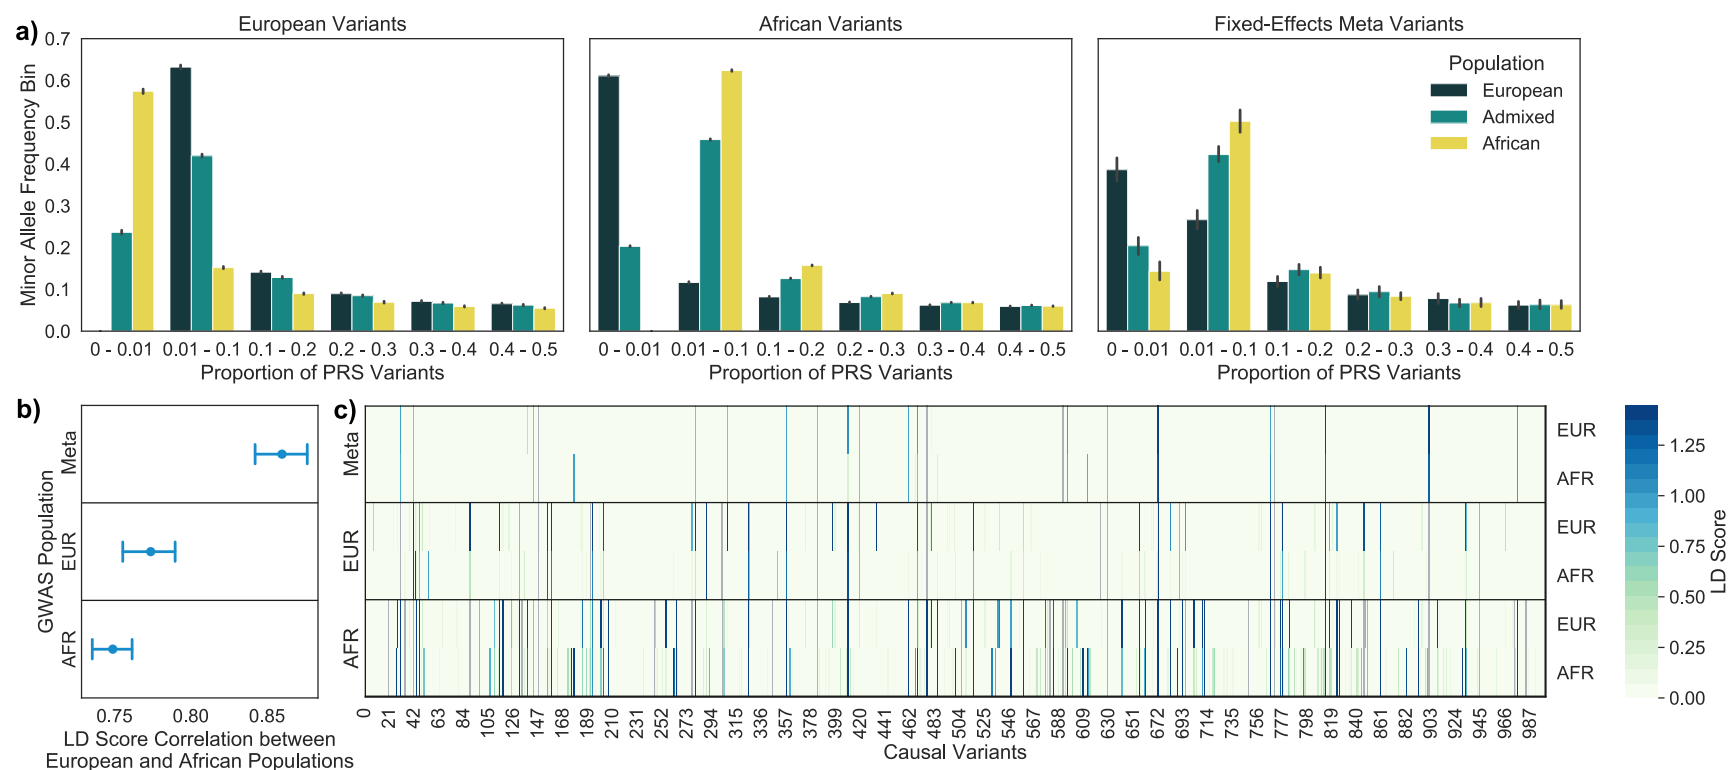

**Figure 4 Legend:** GWAS significant variants are more common in the study population from which they were discovered; however, African Ancestry GWAS variants may result in better LD tagging across populations. Variants were selected from a European or African ancestry GWAS or a fixed-effects meta of both populations. 4a. GWAS variants were binned by their minor allele frequency estimated from the European, African, and admixed populations. The error bar represents the 95% CI across simulations. 4b. LD scores were calculated for every causal variant by adding up the LD  $r^2$  for each GWAS tag variant within  $\pm 1000$

kb of the causal variant. LD scores calculated in a Europeans and Africans were compared by Pearson's correlation. The results were summarized across simulations as the average and 95% CI. 4c. Raw LD scores for each causal variant ( $m = 1000$ ) calculated in a European or African population for one simulation. Each panel shows the approach used for variant selection. Causal variants directly discovered through the GWAS are colored in grey.
